# Supplementary material
Source: ML conference proceedings conference paper supplement (https://www.ecva.net/papers/eccv_2020/papers_ECCV/html/123680018_ECCV_2020_paper.php)
Supplement: Supplementary file 1 [file 123680018-supp.pdf]

# Principal Feature Visualisation in Convolutional Neural Networks

## *Supplementary Material*

Marianne Bakken<sup>1,2</sup>[0000–0003–4958–8194], Johannes Kvam<sup>1</sup>,  
Alexey A. Stepanov<sup>1</sup>, and Asbjørn Berge<sup>1</sup>

<sup>1</sup> SINTEF Digital, Forskningsveien 1, 0373 Oslo, Norway  
[marianne.bakken@sintef.no](mailto:marianne.bakken@sintef.no)  
<https://www.sintef.no/en/>

<sup>2</sup> Norwegian University of Life Sciences (NMBU), 1432 Ås, Norway

This document contains supplementary material for the paper *Principal Feature Visualisation in Convolutional Neural Networks* published at ECCV 2020 (paper ID 4198). Please see the paper for details on experimental setup.

Our code is available at <https://github.com/SINTEF/PFV>.

## 1 PASCAL VOC examples

Same setup as in Section 5.2 of the paper.

### 1.1 Batches of 20 classes

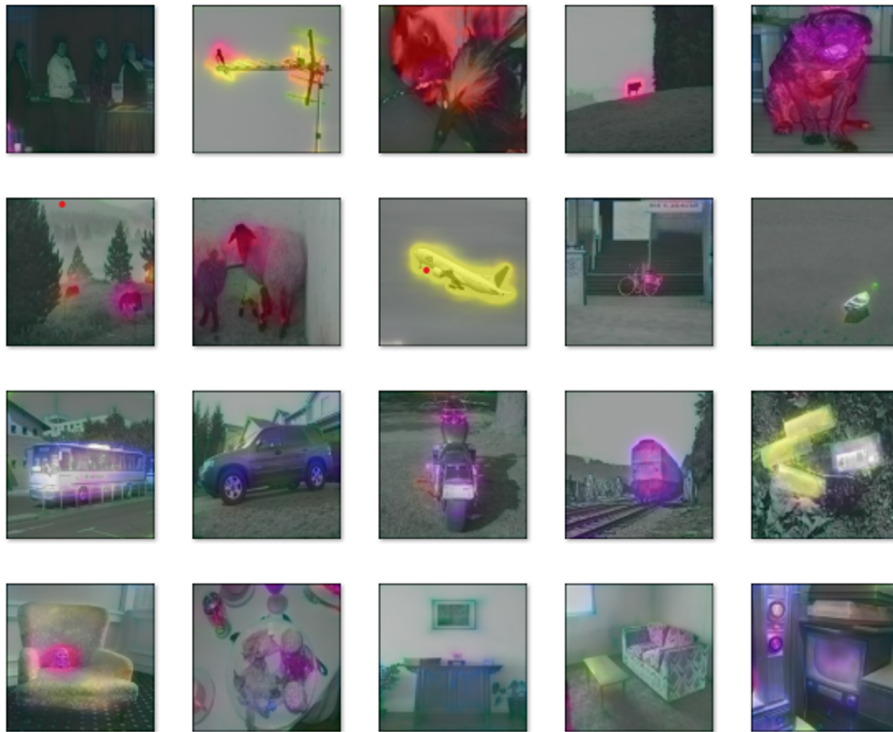

**Fig. 1.** PFV on batch of all 20 classes. Batch number 1.

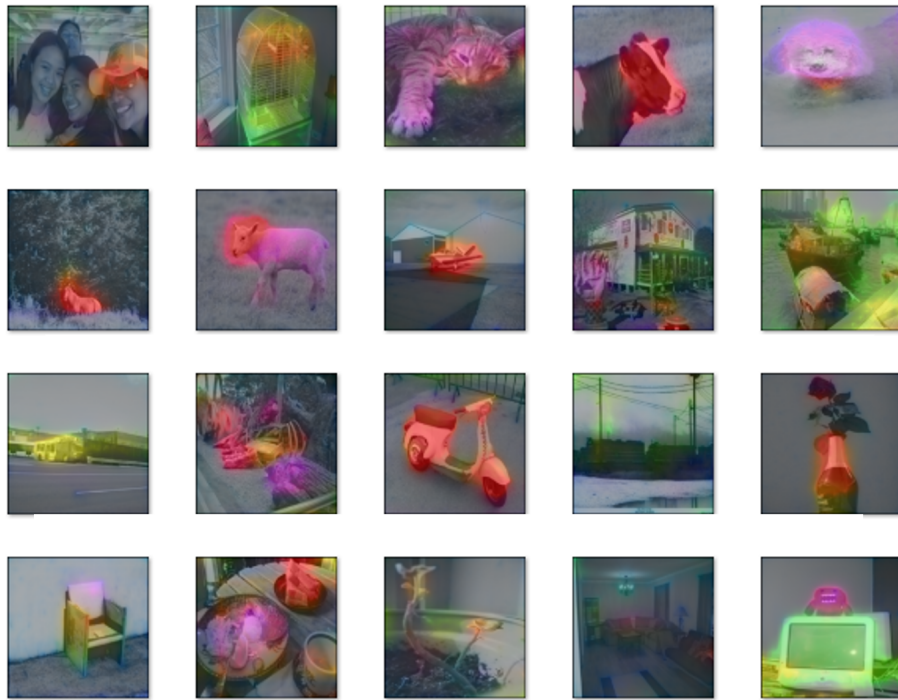

**Fig. 2.** PFV on batch of all 20 classes. Batch number 2.

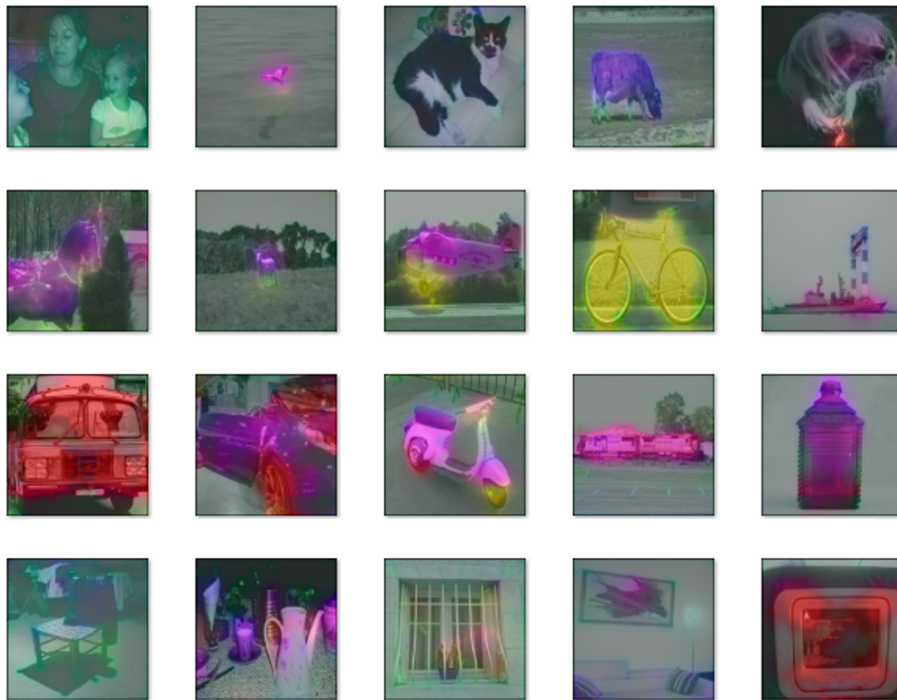

**Fig. 3.** PFV on batch of all 20 classes. Batch number 3.



### 1.2 Batches of 3 classes

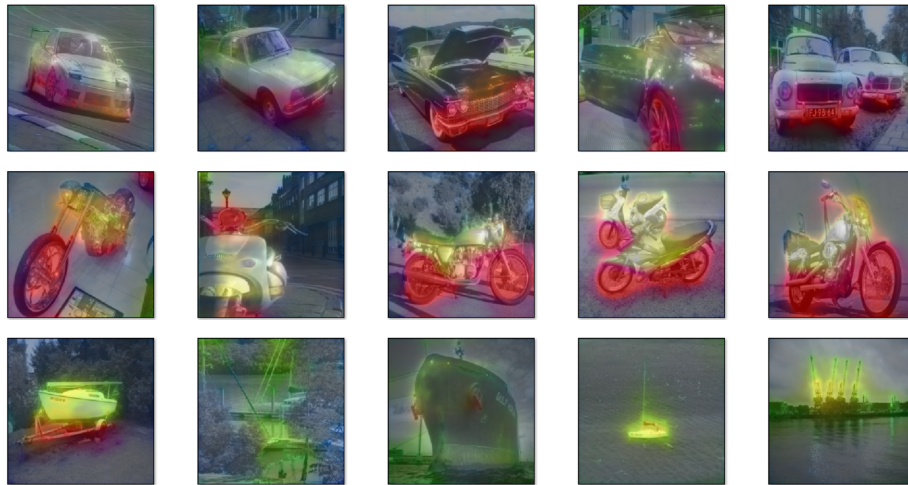

Fig. 4. PFV on batch of 3 classes: Motorbike, boat and car

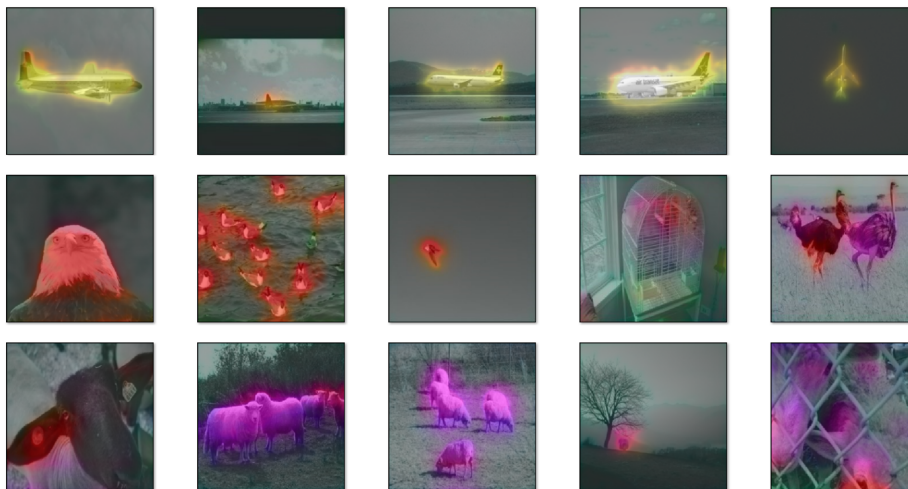

Fig. 5. PFV on batch of 3 classes: aeroplane, bird and sheep

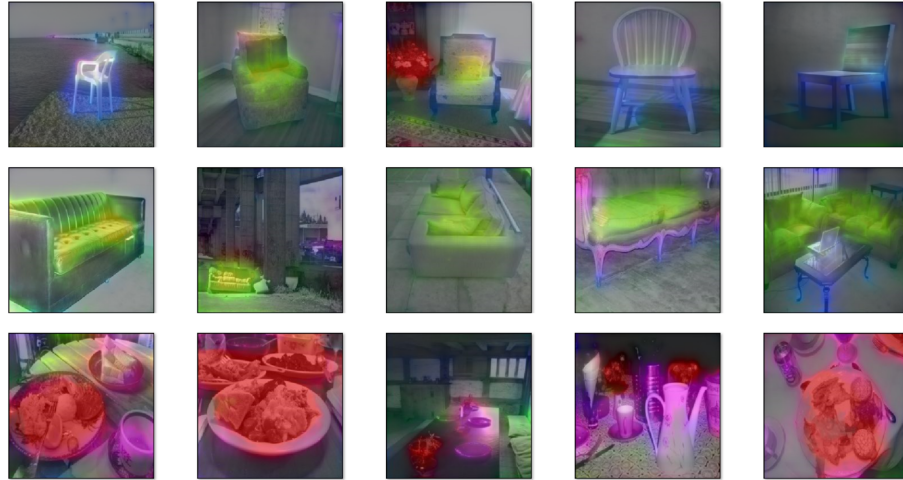

**Fig. 6.** PFV on batch of 3 classes: chair, sofa, diningtable

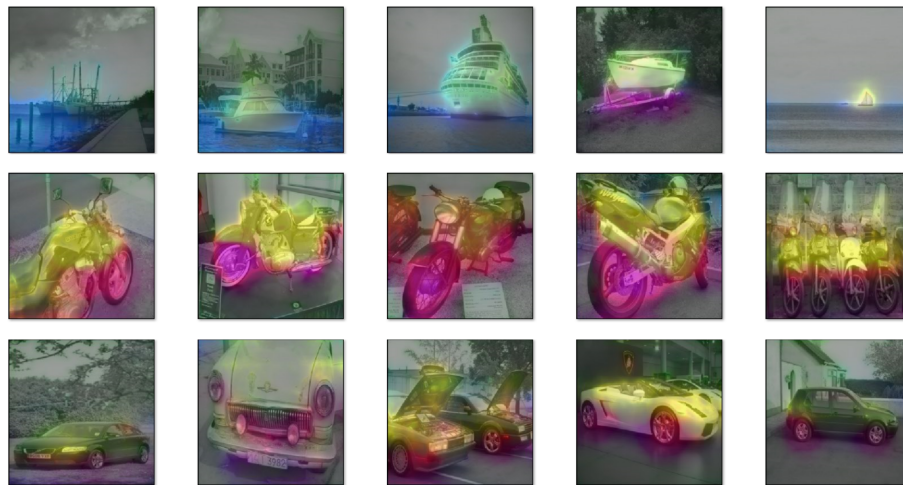

**Fig. 7.** PFV on batch of 3 classes: boat, motorbike, car
